# Supplementary material for: Kinetics during hydrothermal synthesis of nanosized KxNa1−xNbO3
Source: Royal Society of Chemistry journal article supplement (doi:10.1039/c8ce01178h), 2018-01-01
Supplement: c8ce01178h1.pdf [file c8ce01178h1.pdf]

## Supporting information:

### Kinetics of the hydrothermal synthesis of nanosized $K_xNa_{1-x}NbO_3$

*Susanne Linn Skjærvø<sup>a</sup>, Kristin Høydalsvik Wells<sup>a</sup>, Wouter van Beek<sup>b</sup>, Tor Grande<sup>a</sup> and Mari-Ann Einarsrud<sup>a,\*</sup>*

- a. FACET Functional Materials and Materials Chemistry, Department of Materials Science and Engineering, Norwegian University of Science and Technology, 7491 Trondheim, Norway
- b. Swiss-Norwegian Beamlines at the European Synchrotron Radiation Facility, 71 Avenue des Martyrs, CS 40220, 38043 Grenoble Cedex 9, France

Key words: *in situ* X-ray diffraction, time-resolved, synchrotron, nucleation and growth, hydrothermal, solvothermal

\*Corresponding author:

Mari-Ann Einarsrud

mari-ann.einarsrud@ntnu.no

phone: +47 48136521

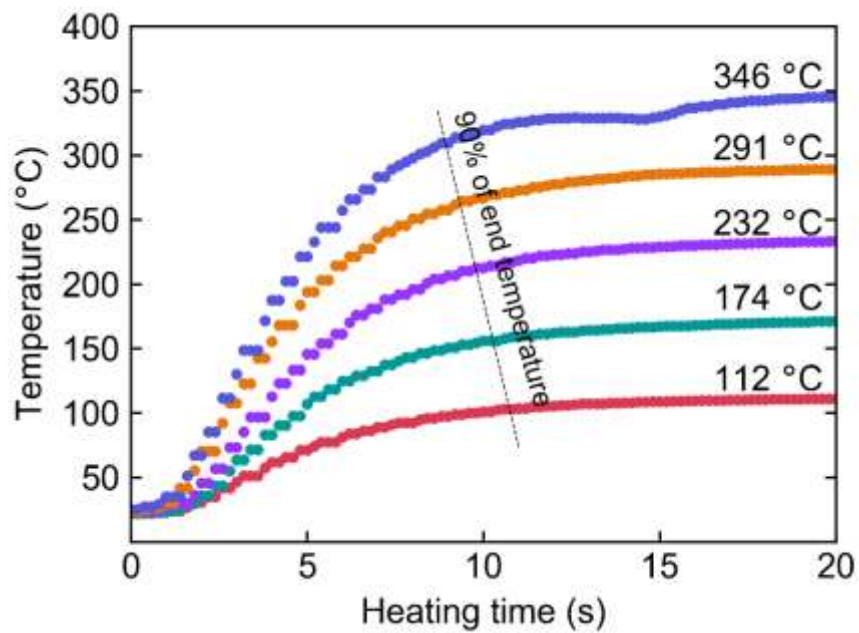

**Figure S1** Temperature profiles for different end temperatures, measured with a thermocouple inside a capillary filled with pure water and pressurized to 100 bar. The temperatures on top of each plot gives the end temperature for each measurement.

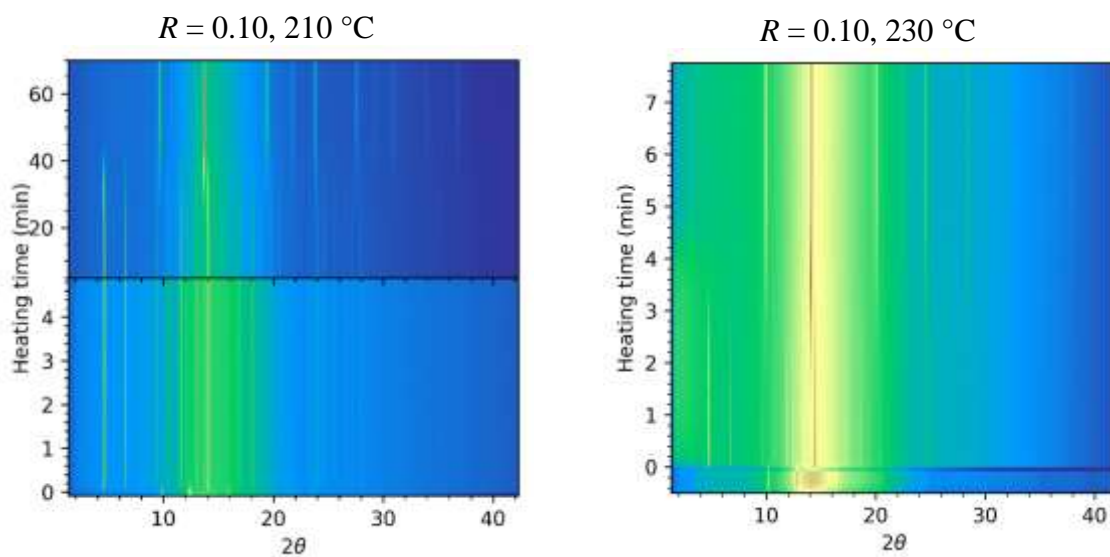

$R = 0.15, 210\text{ }^{\circ}\text{C}$

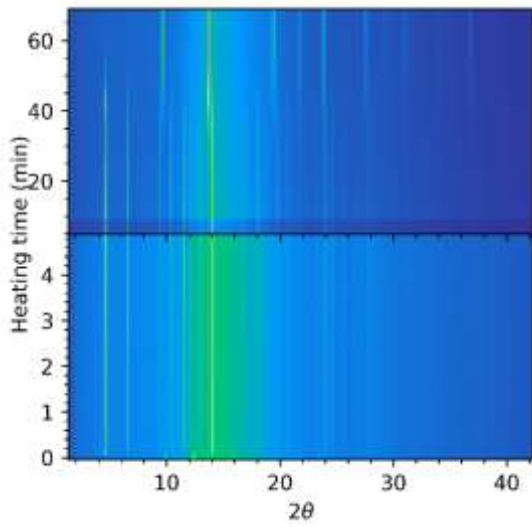

$R = 0.15, 290\text{ }^{\circ}\text{C}$

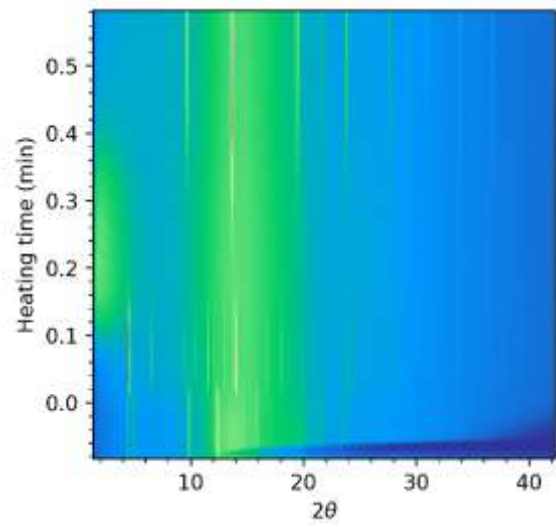

$R = 0.25, 230\text{ }^{\circ}\text{C}$

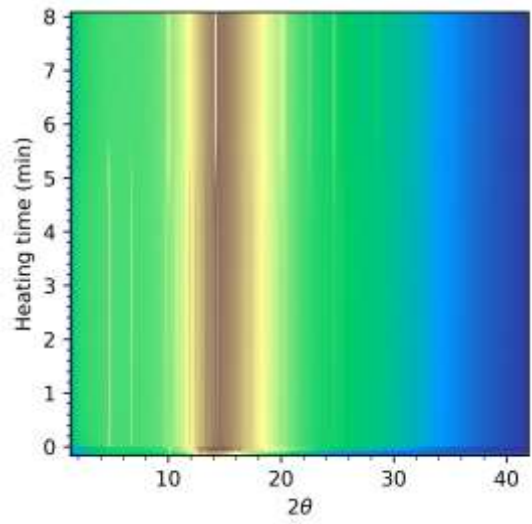

$R = 0.25, 230\text{ }^{\circ}\text{C}$

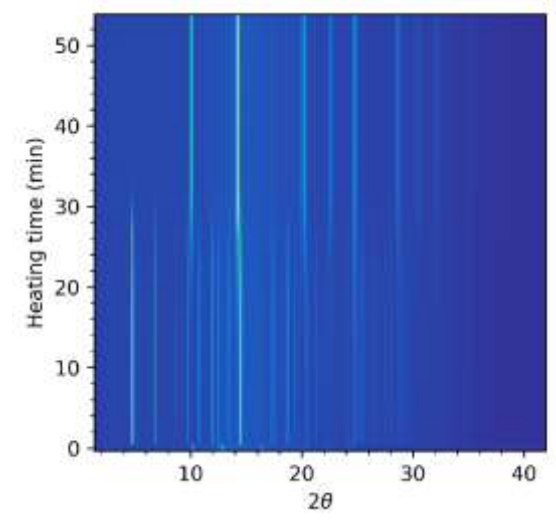

$R = 0.30, 210\text{ }^{\circ}\text{C}$

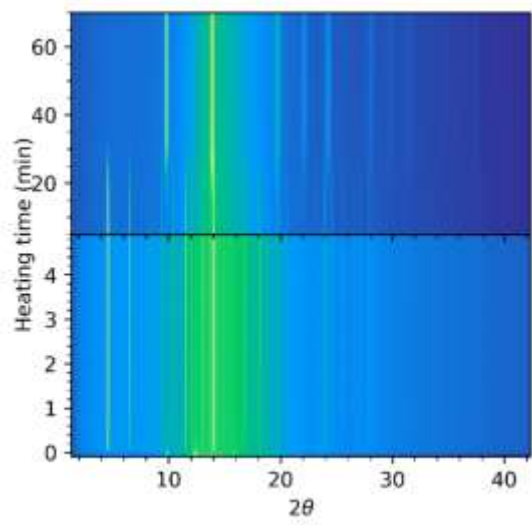

$R = 0.30, 230\text{ }^{\circ}\text{C}$

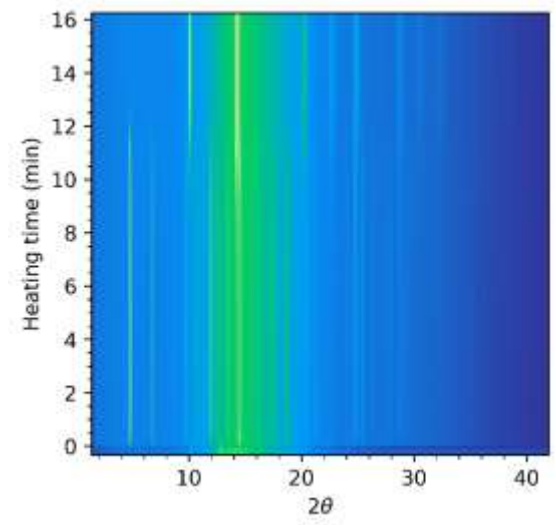

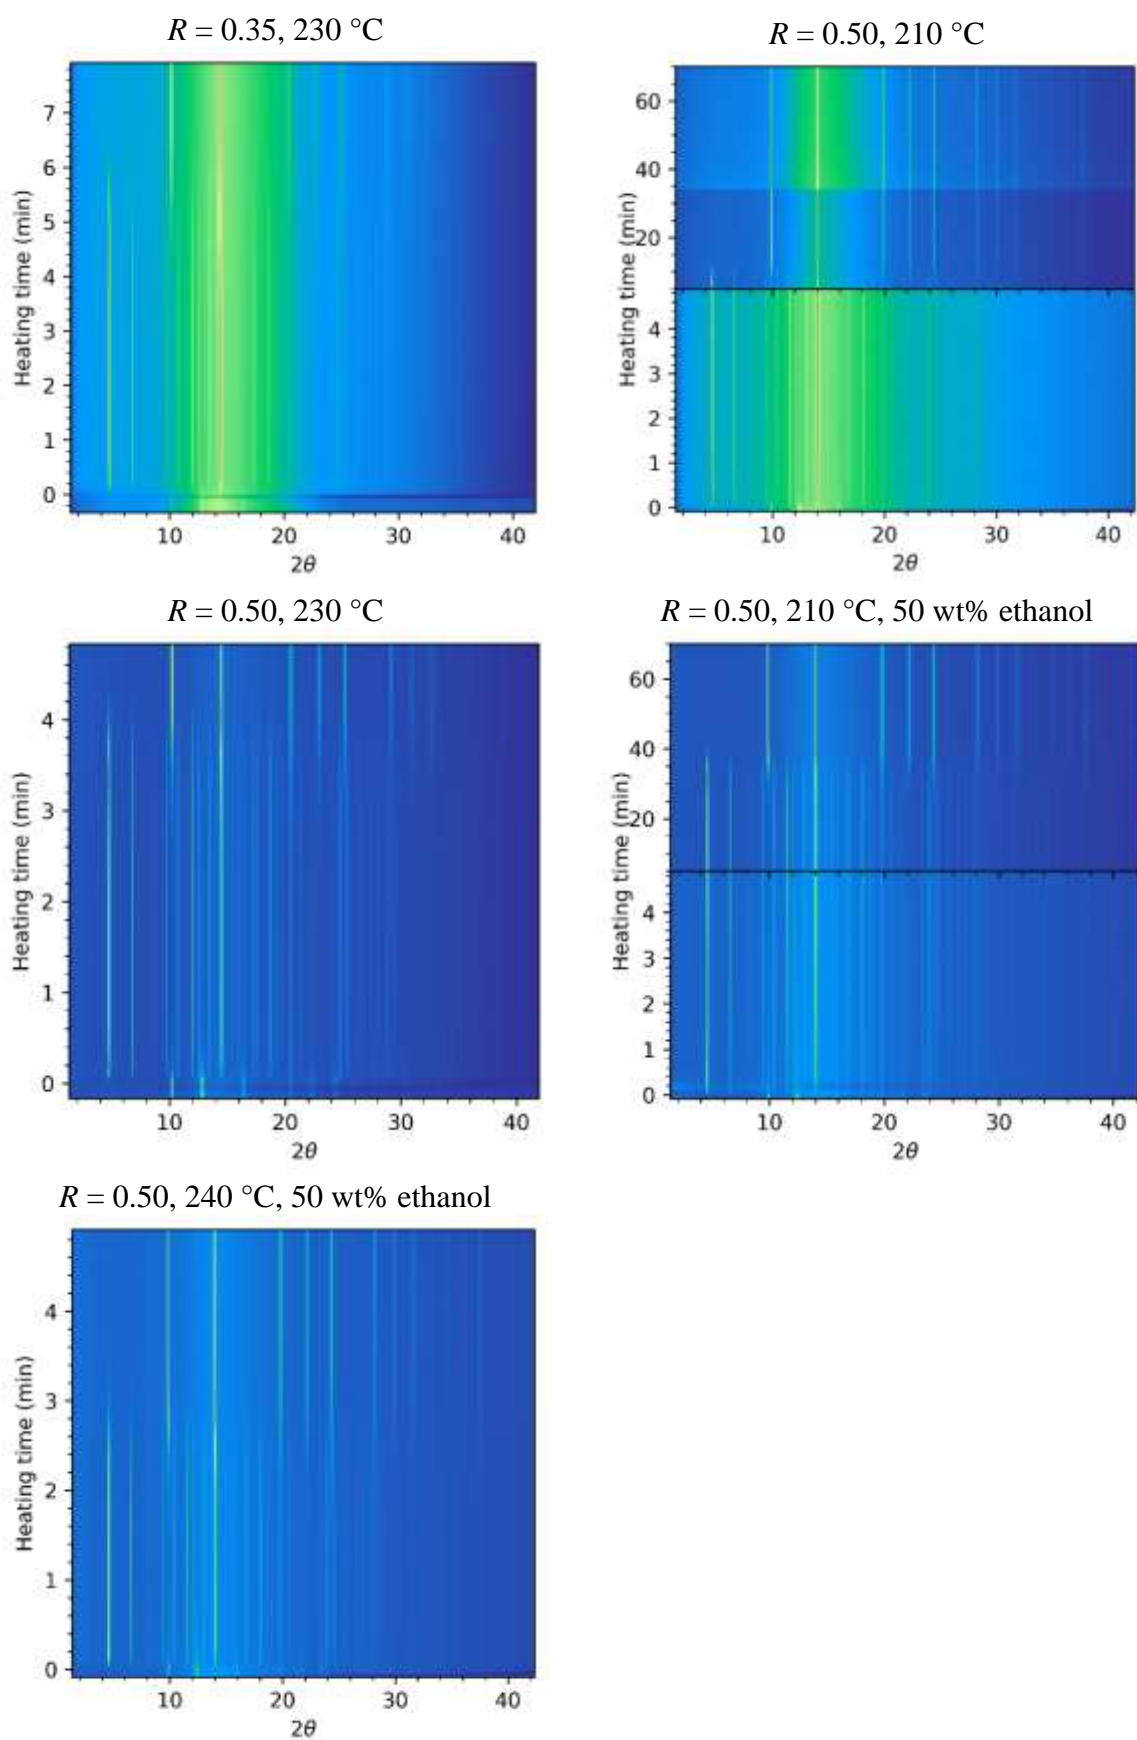

**Figure S2** Contour plots showing the phase evolution during hydrothermal synthesis of  $K_xNa_{1-x}NbO_3$  at various temperatures and  $R$ -values. The two experiments with 50/50 wt% water and ethanol are indicated.

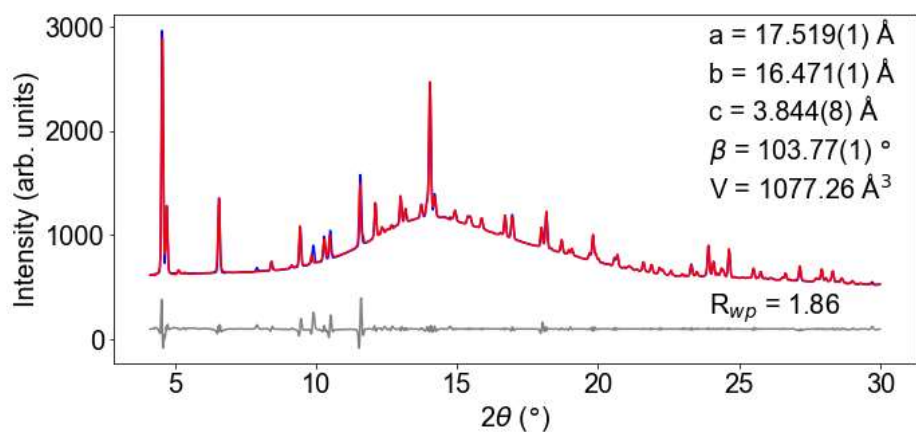

**Figure S3** Visualization of Pawley fit of the intermediate phase produced at 210 °C for  $R = 0.5$ . The wavelength is 0.6776 Å.

$R = 0.10, 210\text{ }^{\circ}\text{C}$

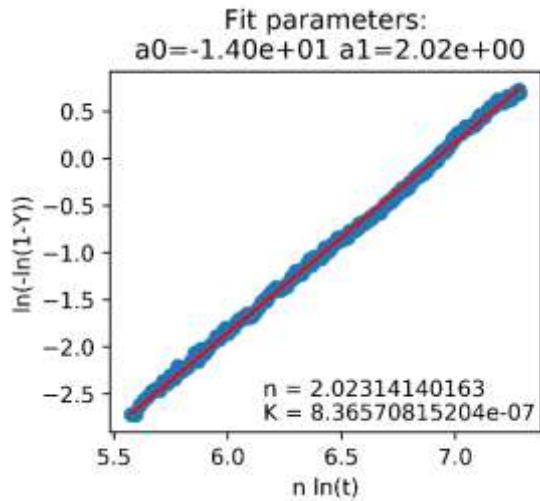

$R = 0.10, 230\text{ }^{\circ}\text{C}$

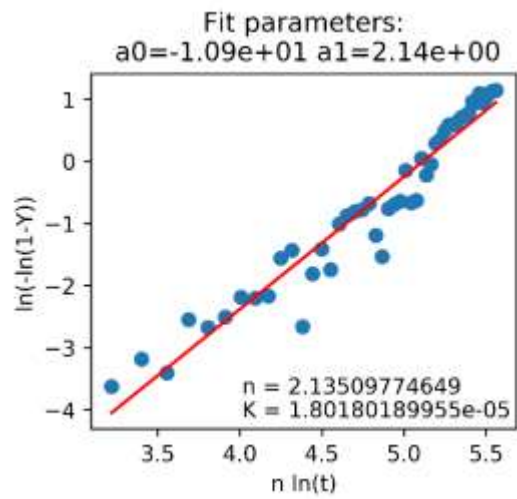

$R = 0.15, 210\text{ }^{\circ}\text{C}$

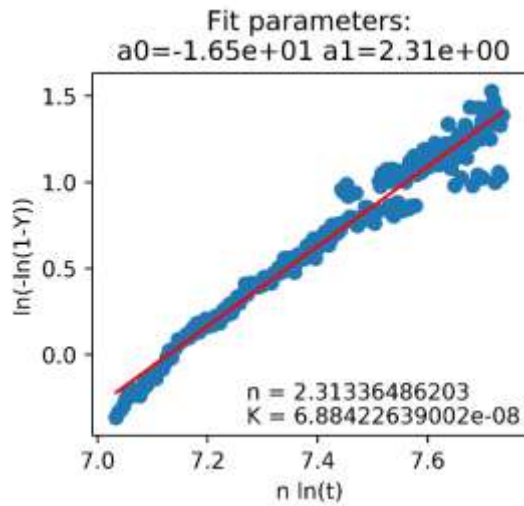

$R = 0.15, 290\text{ }^{\circ}\text{C}$

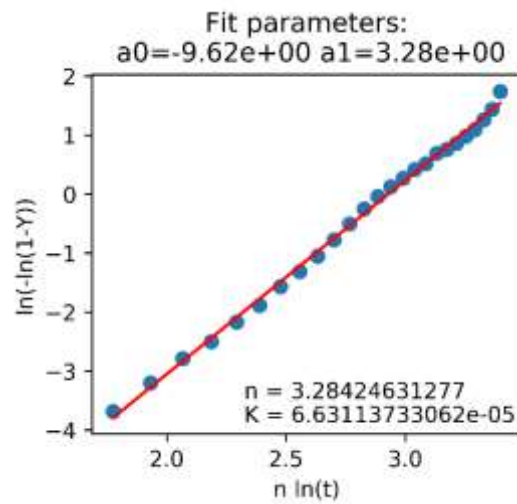

$R = 0.25, 230\text{ }^{\circ}\text{C}$

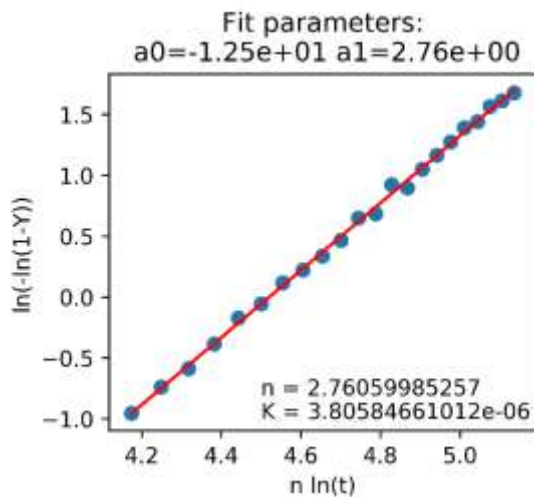

$R = 0.25, 230\text{ }^{\circ}\text{C}$

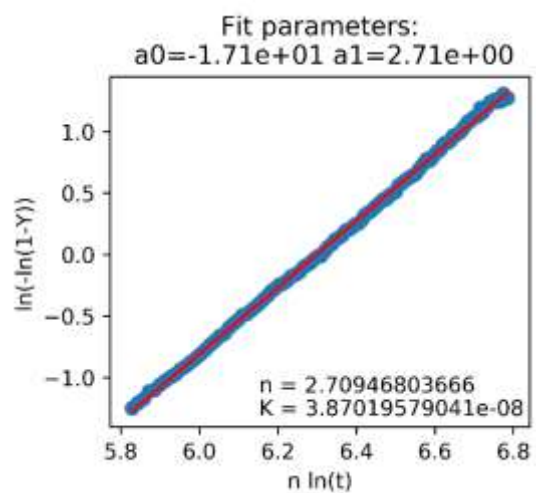

$R = 0.30, 210\text{ }^{\circ}\text{C}$

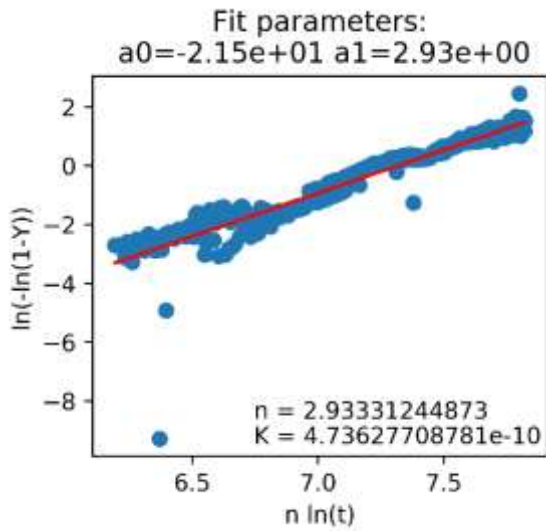

$R = 0.30, 230\text{ }^{\circ}\text{C}$

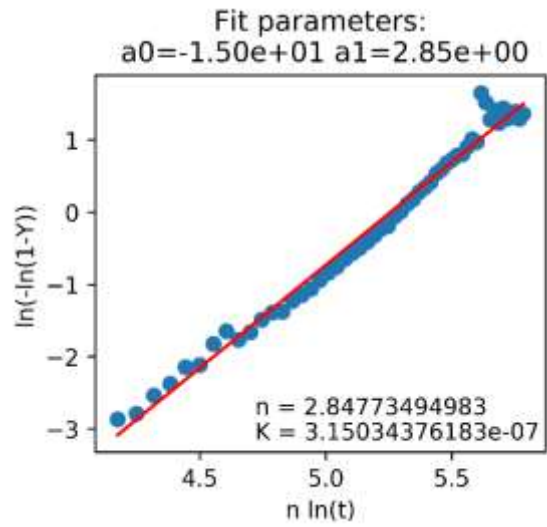

$R = 0.35, 230\text{ }^{\circ}\text{C}$

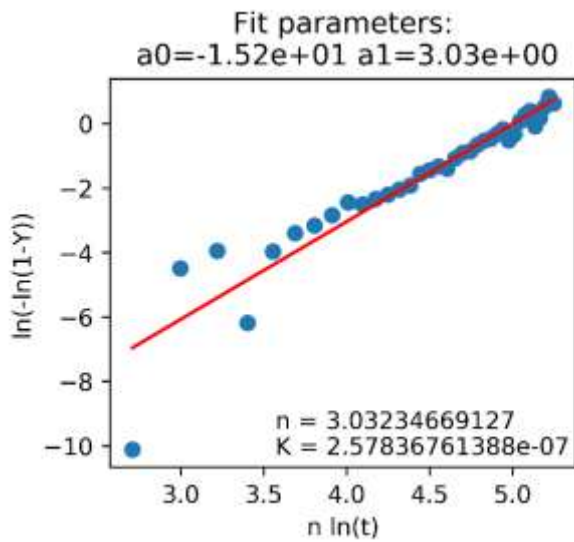

$R = 0.50, 210\text{ }^{\circ}\text{C}$

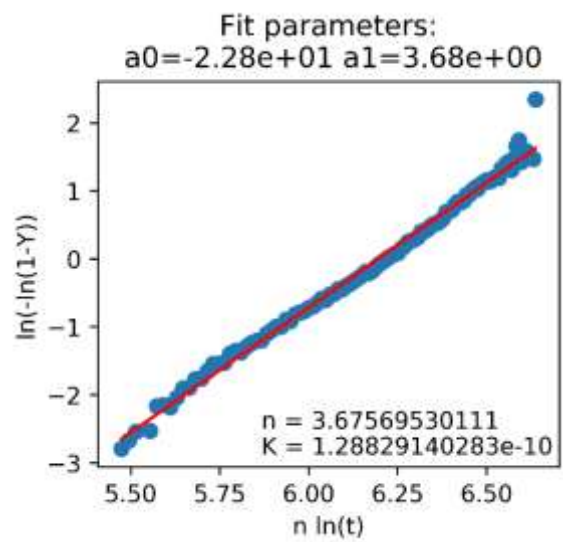

$R = 0.50, 230\text{ }^{\circ}\text{C}$

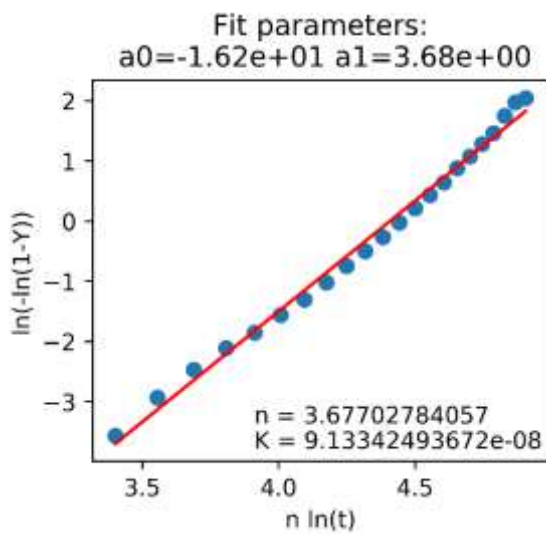

$R = 0.50, 210\text{ }^{\circ}\text{C}, 50\text{ wt\% ethanol}$

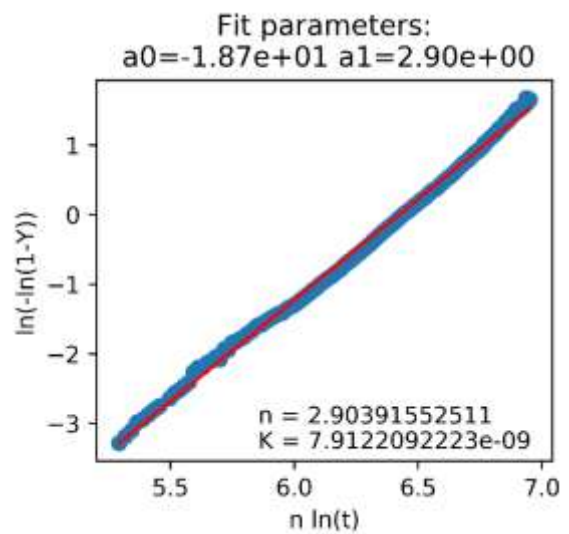

$R = 0.50$ , 240 °C, 50 wt% ethanol

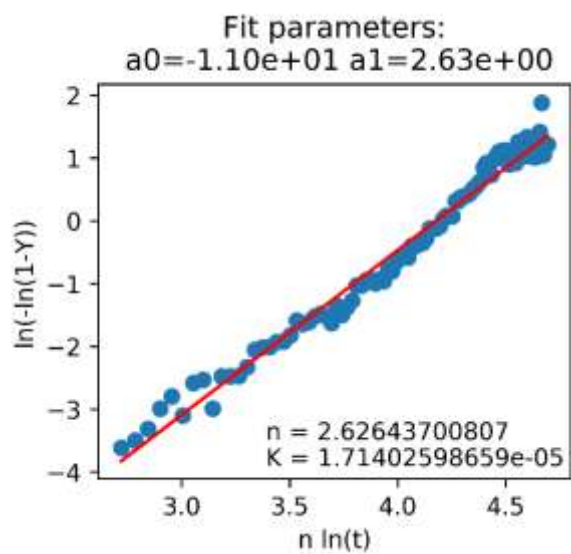

**Figure S4** Sharp-Hancock plots showing the growth of  $K_xNa_{1-x}NbO_3$  during hydrothermal synthesis at various temperatures and  $R$ -values. The two experiments with 50/50 wt% water and ethanol are indicated.
